# Supplementary material
Source: PubMed Central journal article supplement (PMC3610056)
Supplement: pro0022-0502-SD1.pdf [file pro0022-0502-SD1.pdf]

**Supplementary Material to**

**Open and Shut: Crystal Structures of the Dodecylmaltoside Solubilized Mechanosensitive  
Channel of Small Conductance from *E. coli* and *H. pylori* at 4.4 Å and 4.1 Å resolution**

Jeffrey Y. Lai<sup>1</sup>, Yan Shuen Poon<sup>1,2</sup>, Jens T. Kaiser, Douglas C. Rees\*

Division of Chemistry and Chemical Engineering 114-96

Howard Hughes Medical Institute

California Institute of Technology

Pasadena, CA 91125

**Table S1 – MscS homologs cloned into pET19, pET26, and pET28 vectors**

|           | Organism                               | DNA Insert Size (In base pairs) |
|-----------|----------------------------------------|---------------------------------|
| 1         | <i>Aeropyrum pernix</i>                | 843                             |
| <b>2</b>  | <b><u>Archaeoglobus fulgidus</u></b>   | <b>852</b>                      |
| <b>3</b>  | <b><u>Anabaena variabilis</u></b>      | <b>882</b>                      |
| 4         | <i>Bartonella bacilliformis</i>        | 1239                            |
| 5         | <i>Bartonella henselae</i>             | 1245                            |
| 6         | <i>Bordetella parapertussis</i>        | 864                             |
| 7         | <i>Chlorobium tepidum</i>              | 906                             |
| <b>8</b>  | <b><u>Helicobacter pylori</u></b>      | <b>825</b>                      |
| 9         | <i>Legionella pneumophila</i>          | 2976                            |
| <b>10</b> | <b><u>Marinobacter aquaeolei</u></b>   | <b>861</b>                      |
| 11        | <i>Methanocaldococcus jannaschii</i>   | 1086                            |
| 12        | <i>Novosphingobium aromativicorans</i> | 993                             |
| 13        | <i>Pseudoalteromonas atlantica</i>     | 1077                            |
| 14        | <i>Pyrococcus furiosus</i>             | 1005                            |
| 15        | <i>Rhodospirillum rubrum</i>           | 2634                            |
| 16        | <i>Roseobacter denitrificans</i>       | 1344                            |
| 17        | <i>Shewanella frigidimarina</i>        | 861                             |
| <b>18</b> | <b><u>Shewanella lohica</u></b>        | <b>852</b>                      |
| 19        | <i>Staphylococcus aureus</i>           | 882                             |
| 20        | <i>Thermoplasma acdiophilum</i>        | 861                             |
| <b>21</b> | <b><u>Thermoplasma volcanium</u></b>   | <b>867</b>                      |
| 22        | <i>Thermotoga maritime</i>             | 807                             |
| 23        | <i>Thermus thermophilus</i>            | 891                             |
| <b>24</b> | <b><u>Vibrio cholera</u></b>           | <b>864</b>                      |
| 25        | <i>Zymomonas mobilis</i>               | 1158                            |

The 14 underlined MscS homologues (numbers 2-6, 8, 10, 16-18, 21, 23-24) were identified as having reasonable expression levels in our *E. coli* expression system. The 7 MscS homologues in bold font (numbers 2, 3, 8, 10, 18, 21 and 24) exhibited monodisperse behavior by size exclusion chromatography in at least 1 detergent, and the 3 MscS homologues highlighted in yellow (2, 8 and 21) were successfully scaled up and screened for crystallization conditions; only the *H. pylori* MscS (number 8) gave any crystallization hits.

**Table S2 List of Detergents used for Screening**

| Detergent                | Concentration (w/v) |
|--------------------------|---------------------|
| Chaps                    | 1%                  |
| Zwittergent 3-12         | 1%                  |
| Cymal-3                  | 2%                  |
| <b>Cymal-5</b>           | <b>1%</b>           |
| Cymal-7                  | 1%                  |
| Fos-choline 10           | 1%                  |
| <b>Fos-choline 14</b>    | <b>1%</b>           |
| Decyldimethyl glycine    | 1%                  |
| <b>LDAO</b>              | <b>1%</b>           |
| Fos-MEA 10               | 1%                  |
| Fos-choline-iso-11       | 1%                  |
| Octyl glucoside          | 2%                  |
| Nonyl glucoside          | 2%                  |
| Decyl glucoside          | 2%                  |
| HEGA-9                   | 2%                  |
| MEGA-9                   | 1%                  |
| Nonyl maltoside          | 1%                  |
| Decyl maltoside          | 1%                  |
| <b>Dodecyl maltoside</b> | <b>1%</b>           |
| Tridecyl maltoside       | 1%                  |
| Sucrose monodecanoate    | 1%                  |
| Tween 20                 | 1%                  |
| C10E6                    | 1%                  |
| <b>C12E8</b>             | <b>1%</b>           |
| Triton X-114             | 1%                  |

Detergents highlighted in bold were most extensively tested in solubilization studies of various MscS homologs.

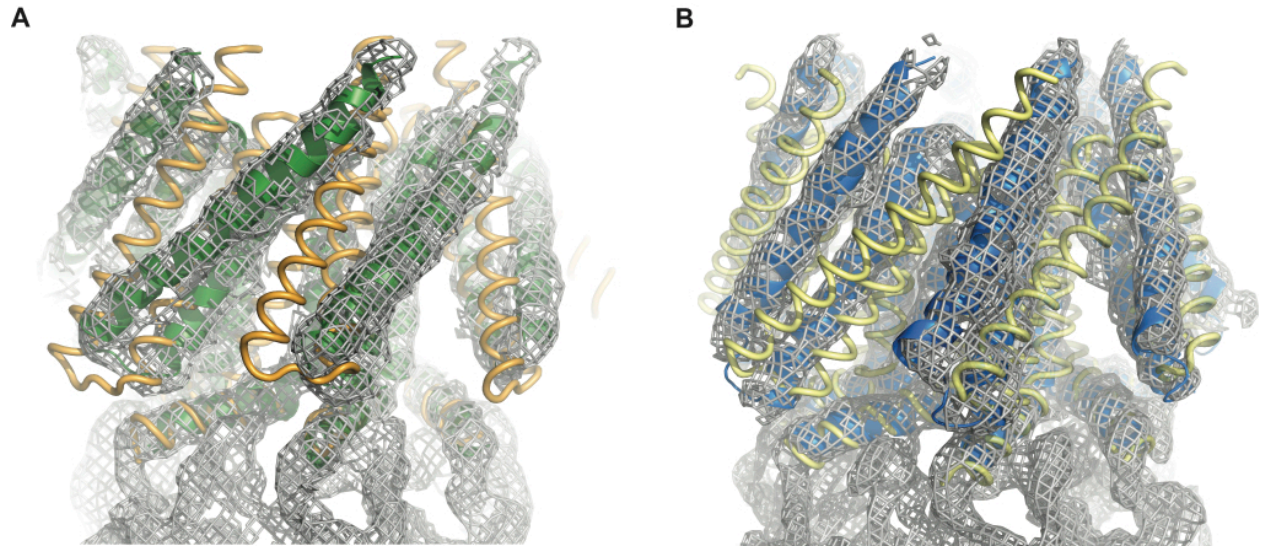

Figure S1 Electron density maps in the transmembrane domain regions of DDM solubilized EcMscS (Fig S1A) and DDM solubilized HpMscS (Fig S1B), calculated using the final refined models. The 2OAU and 2VV5 structures are superimposed to illustrate the correspondence between the electron density maps and the non-conducting and open state structures. For DDM solubilized EcMscS (Fig S1A), the 2VV5 and 2OAU structures are illustrated as green ribbons and gold coils, respectively. For DDM solubilized HpMscS (Fig S1B), the 2OAU and 2VV5 structures are depicted as blue ribbons and yellow coils, respectively. This figure was created with PyMol<sup>37</sup>.
